# Supplementary material for: Conductive silver coatings with ultra-low silver consumption on polyimide film via a mild surface ion exchange self-metallization method
Source: Royal Society of Chemistry journal article supplement (doi:10.1039/c7tc03587j), 2017-01-01
Supplement: c7tc03587j1.pdf [file c7tc03587j1.pdf]

## **Electronic Supplementary Information**

### **Conductive Silver Coating with Ultra-low Silver Consumption on Polyimide Film via a Mild Surface Ion Exchange Self-metallization Method**

Yanqing Wang<sup>a</sup>, Jun Ding<sup>a,\*</sup>, Ning Li<sup>b,\*</sup>, Liping Ding<sup>c,\*</sup>, Deyu Li<sup>b</sup>

<sup>a</sup> Department of Materials Science & Engineering, National University of Singapore, 119260,  
Singapore

<sup>b</sup> School of Chemistry and Chemical Engineering, Harbin Institute of Technology, Harbin 150001,  
China

<sup>c</sup> School of Chemistry and Chemical Engineering, Nantong University, Nantong 226007, China

**Table S1** The Ag consumption and sheet resistance of silver layer on polyimide film fabricated by different methods

| Methods                                              | Ag(wt%) | $R_{\square}(\Omega/\text{sq})$ |
|------------------------------------------------------|---------|---------------------------------|
| Inverse CVD <sup>1</sup>                             | 10      | NC                              |
| Single-stage self-metallization <sup>2</sup>         | 8       | NC                              |
| Surface ion exchange self-metallization <sup>3</sup> | 1.22    | NC                              |
| OIR                                                  | 0.56    | 261±1.3                         |

Note: NC: non-conductive

## The calculation process of the Ag consumption of the silver layer by surface ion exchange self-metallization<sup>3</sup> and OIR method

### I Surface ion exchange self-metallization method<sup>3</sup>

As reported in reference 3, we choose  $R_{\square}$  value when the Ag loading content  $C_I$  is 0.4  $\mu\text{mol}/\text{cm}^2$ . The molar mass of Ag  $M$  is 107.87g/mol. The thickness of polyimide film  $d_I$  is 50  $\mu\text{m}$ , the area of polyimide film  $S_I$  is set as 1  $\text{cm}^2$  and the density of polyimide film  $\rho$  is set as 1.4g/ $\text{cm}^3$ . The silver layer was fabricated on upside and downside of polyimide film at the same time. So the Ag consumption of the silver layer  $\omega_I$  by surface ion exchange self-metallization method<sup>3</sup> can be calculated as follows:

$$\omega_I = \frac{2C_I S_I M}{2C_I S_I M + \rho S_I d_I} \times 100\text{wt}\%$$

$$\omega_I = \frac{2 \times 0.4 \times 10^{-6} \times 1 \times 107.87}{2 \times 0.4 \times 10^{-6} \times 1 \times 107.87 + 1.4 \times 1 \times 50 \times 10^{-4}} \times 100\text{wt}\% = 1.22\text{wt}\%$$

### II OIR method

The Ag loading content  $C_{II}$  is 0.914  $\mu\text{mol}/\text{cm}^2$ . The molar mass of Ag  $M$  is 107.87g/mol. The

thickness of polyimide film  $d_{II}$  is 125 $\mu\text{m}$ , the area of polyimide film  $S_{II}$  is set as 1 $\text{cm}^2$  and the density of polyimide film  $\rho$  is set as 1.4 $\text{g/cm}^3$ . The silver layer was fabricated on the bright side of polyimide film. So the Ag consumption of the silver layer  $\omega_{II}$  by OIR method can be calculated as follows:

$$\omega_{II} = \frac{2C_{II}S_{II}M}{2C_{II}S_{II}M + \rho S_{II}d_{II}} \times 100\text{wt}\%$$

$$\omega_{II} = \frac{0.914 \times 10^{-6} \times 1 \times 107.87}{0.914 \times 10^{-6} \times 1 \times 107.87 + 1.4 \times 1 \times 125 \times 10^{-4}} \times 100\text{wt}\% = 0.56\text{wt}\%$$

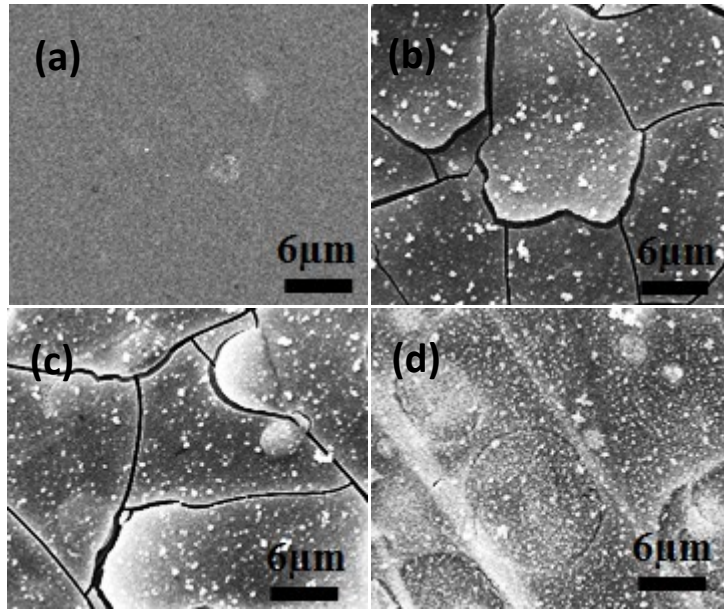

**Figure S1** SEM images of progress of fabricating conductive silver coating by OIR method on polyimide film (a) after chemical degreasing process (b) after O process (c) after I process (d) after R process.

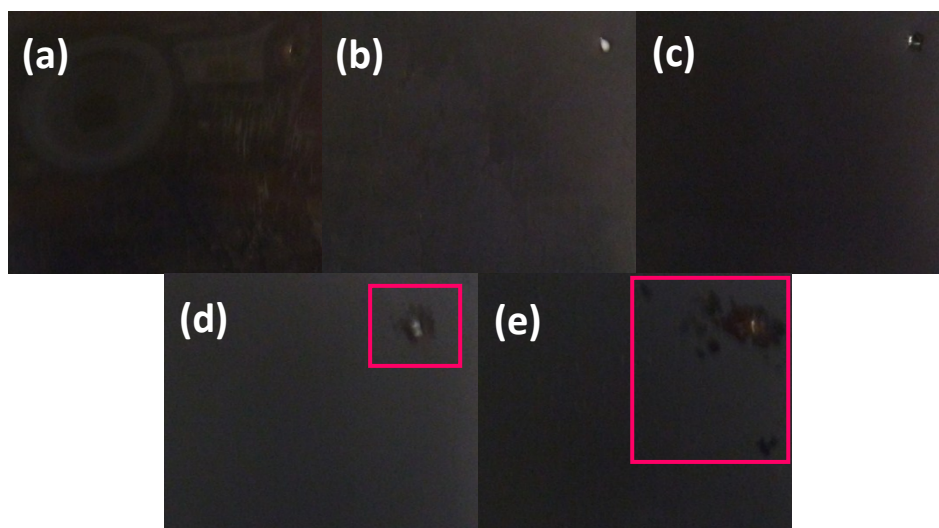

**Figure S2** Digital photographs of manganese oxide modified layer under different  $t_O$  (a) 1 h (b) 3 h (c) 5 h (d) 7 h (e) 9 h

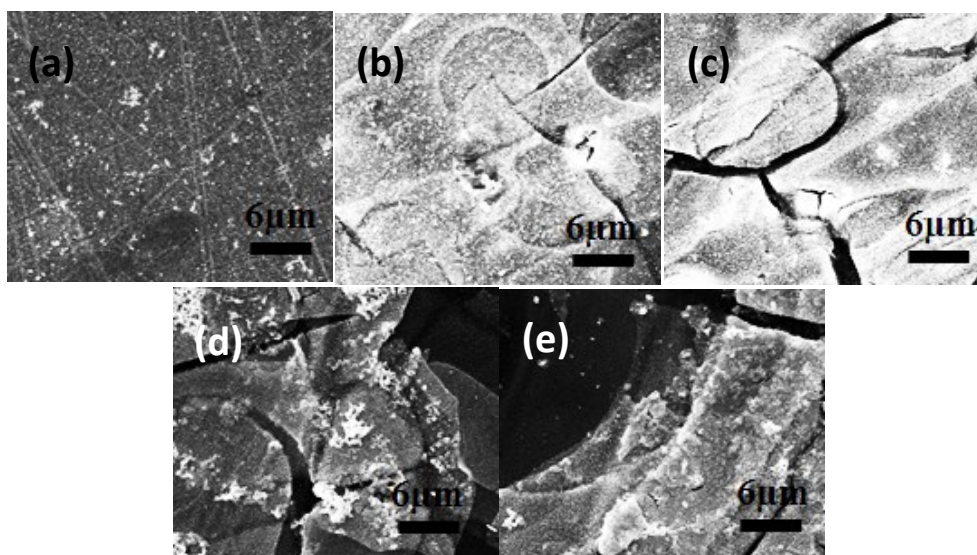

**Figure S3** The influence of  $t_O$  on the morphology of silver coating (a) 1 h (b) 3 h (c) 5 h (d) 7 h (e) 9 h. Note:  $t_I=30\text{min}$ ,  $t_R=1\text{h}$ .

**Table S2** The influence of  $t_0$  on the thickness  $d$ , the sheet resistance  $R_{\square}$ , resistivity  $\rho$  of silver coating.

| $t_0(\text{h})$ | $d(\text{nm})$ | $R_{\square}(\Omega/\text{sq})$ | $\rho(\mu\Omega \cdot \text{cm})$ |
|-----------------|----------------|---------------------------------|-----------------------------------|
| 1               | $30 \pm 3$     | NC                              | NC                                |
| 3               | $80 \pm 8$     | $448.3 \pm 2.2$                 | $3586.4 \pm 53.8$                 |
| 5               | $100 \pm 10$   | $446.8 \pm 2.2$                 | $4468 \pm 67.0$                   |
| 7               | $110 \pm 11$   | $763.9 \pm 3.8$                 | $8402.9 \pm 126.0$                |
| 9               | $90 \pm 9$     | NUC                             | PC                                |

Note:  $\rho = R_{\square} \times d$ , NUC: Non-uniform conductive, PC: partly conductive

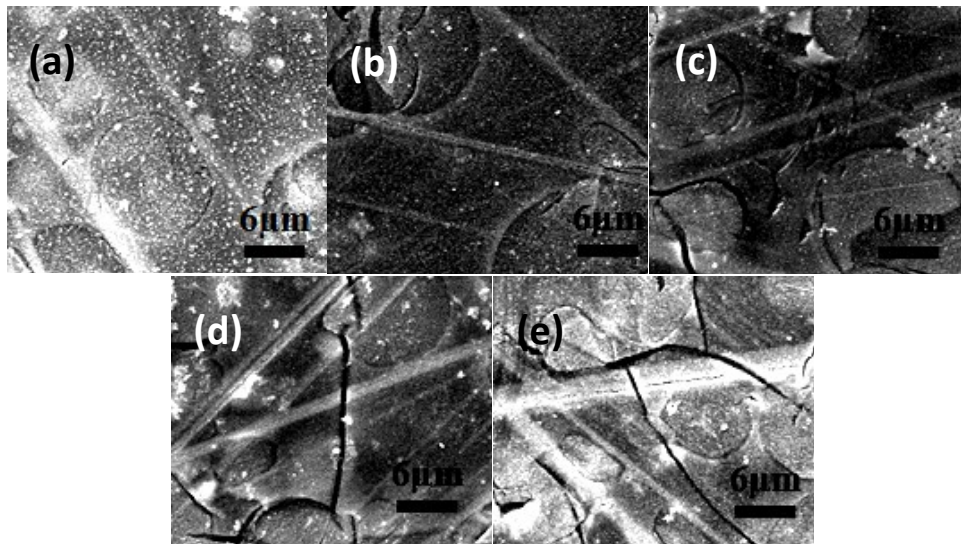

**Figure S4** The influence of  $t_1$  on the morphology of silver coating (a) 15min (b) 30min (c) 45min (d) 60min (e) 75min. Note:  $t_R = 1\text{h}$ .

## REFERENCES

- 1 R. E. Southward and D.W. Thompson, *Adv Mater*, 1999, **12**, 1043.
- 2 R. E. Southward and D. W. Thompson, *Chem Mater*. 2004, **16**, 1277.
- 3 G Cui, D Wu, Y Zhao, W Liu and Z Wu, *Acta Mater*, 2013, **61**, 4080.
